# Supplementary material
Source: publisher figshare collection journal article supplement (https://acs.figshare.com/ndownloader/files/22262544)
Supplement: Supplementary file 1 [file 22262544]

**Supporting Information for**

**New Insights on the Formation Process and Thermodynamics of the**

**$\alpha$ -phase PdH(D)<sub>x</sub> through Direct Enthalpy Measurement of H(D)**

**Dissolution**

Shun Dekura,<sup>1†</sup> Hiroshi Akiba,<sup>2</sup> Osamu Yamamuro,<sup>\*2</sup> Hirokazu Kobayashi,<sup>1,3</sup> and Hiroshi Kitagawa<sup>\*1</sup>

<sup>1</sup>*Division of Chemistry, Graduate School of Science, Kyoto University, Kitashirakawa-Oiwakecho, Sakyo-ku, Kyoto 606-8502, Japan*

<sup>2</sup>*Institute for Solid State Physics, University of Tokyo, 5-1-5 Kashiwanoha, Kashiwa, Chiba, 277-8581, Japan*

<sup>3</sup>*Precursory Research for Embryonic Science and Technology (PRESTO), Japan Science and Technology Agency (JST), Honcho 4-1-8, Kawaguchi, Saitama 332-0012, Japan*

<sup>†</sup> *Current address: Institute for Solid State Physics, The University of Tokyo, 5-1-5 Kashiwanoha, Kashiwa, Chiba 277-8581, Japan.*

Email: yamamuro@issp.u-tokyo.ac.jp, kitagawa@kuchem.kyoto-u.ac.jp

## Characterization of the sample

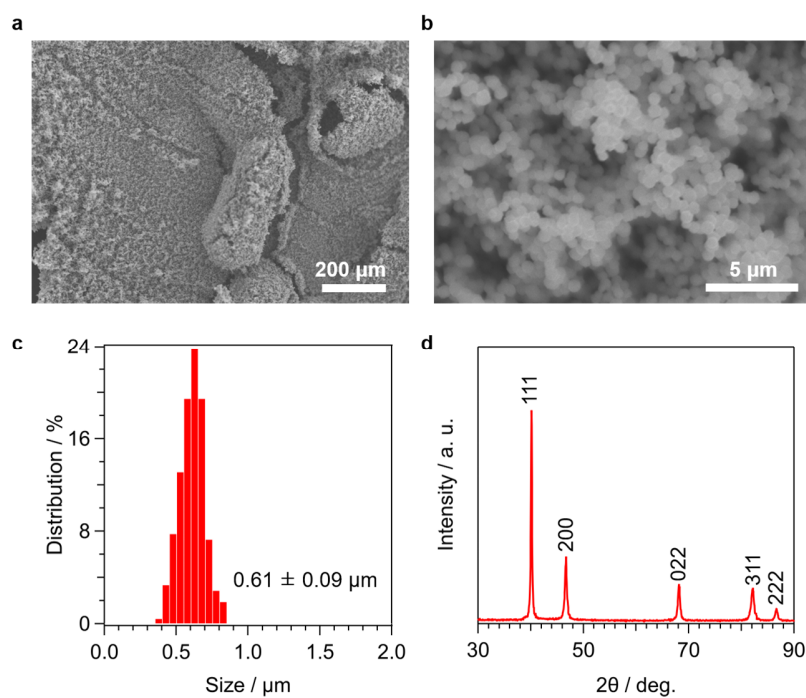

**Figure S1.** (a), (b) SEM images of Pd microparticles. (c) Size distribution of Pd microparticles obtained from the image in (b). (d) PXRD pattern of the sample.

### Calculation of the H(D) absorption amount

Figure S2 shows the schematic picture of the gas line equipped with the calorimeter.<sup>1,2</sup> The gas line can be divided into three regions, with the volume  $^1V$ ,  $^2V$ , and  $^3V$  for *Regions 1*, *2*, and *3*, respectively. Only *Region 3* was kept in an adiabatic condition, and *Regions 1* and *2* were at room temperature. At the  $n$ th step of the measurement of the  $\alpha$  phase, we first closed the valves  $V_2$ – $V_6$  and  $NV_1$  ( $V_1$  was always open), and then introduced  $H_2$  or  $D_2$  gas into *Region 1* up to the pressure  $^1P_n^i$ . After opening  $V_3$ ,  $H_2$  or  $D_2$  gas was slowly introduced into the sample cell by controlling  $V_2$  and  $NV_1$  so as to maintain the adiabatic condition. After opening  $V_2$  and  $NV_1$  fully, we maintained the adiabatic condition until equilibrium was achieved.

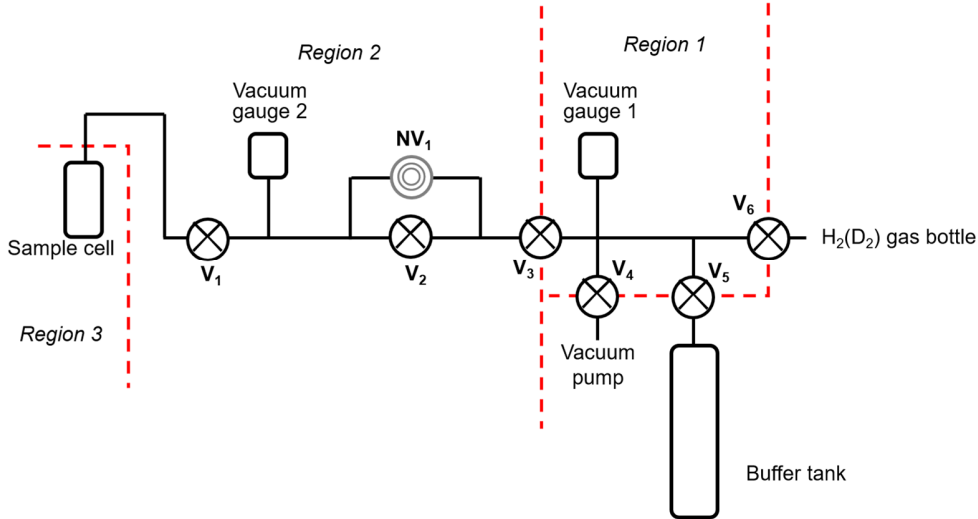

**Figure S2.** A schematic of the gas line equipped with the calorimeter.

The absorbed molar amount of H or D at the  $n$ th step,  $\Delta N_n$ , can be calculated by the temperature and pressure change of each region, based on ideal gas approximation:

$$\Delta N_n = \frac{2}{R} \left[ \left( \frac{^1P_n^i}{^1T_n^i} - \frac{^1P_n^f}{^1T_n^f} \right) + \left( \frac{^2P_n^i}{^2T_n^i} - \frac{^2P_n^f}{^2T_n^f} \right) + \left( \frac{^3P_n^i}{^3T_n^i} - \frac{^3P_n^f}{^3T_n^f} \right) \right]$$

Here,  $(^1T_n^i, ^1P_n^i)$ ,  $(^2T_n^i, ^2P_n^i)$ , and  $(^3T_n^i, ^3P_n^i)$  are the temperature and pressure of each region before opening  $V_3$ , and  $(^1T_n^f, ^1P_n^f)$ ,  $(^2T_n^f, ^2P_n^f)$ , and  $(^3T_n^f, ^3P_n^f)$  are those at the equilibrium.

On the other hand, at thermal equilibrium, a slight incompleteness of the adiabatic condition causes a

temperature drift, which can be observed as the constant slope. Taking account of this, the temperature change at the  $n$ th step,  $\Delta T_n$ , was estimated as shown in Figure 1b in the main text.

### Absorption speed at each step

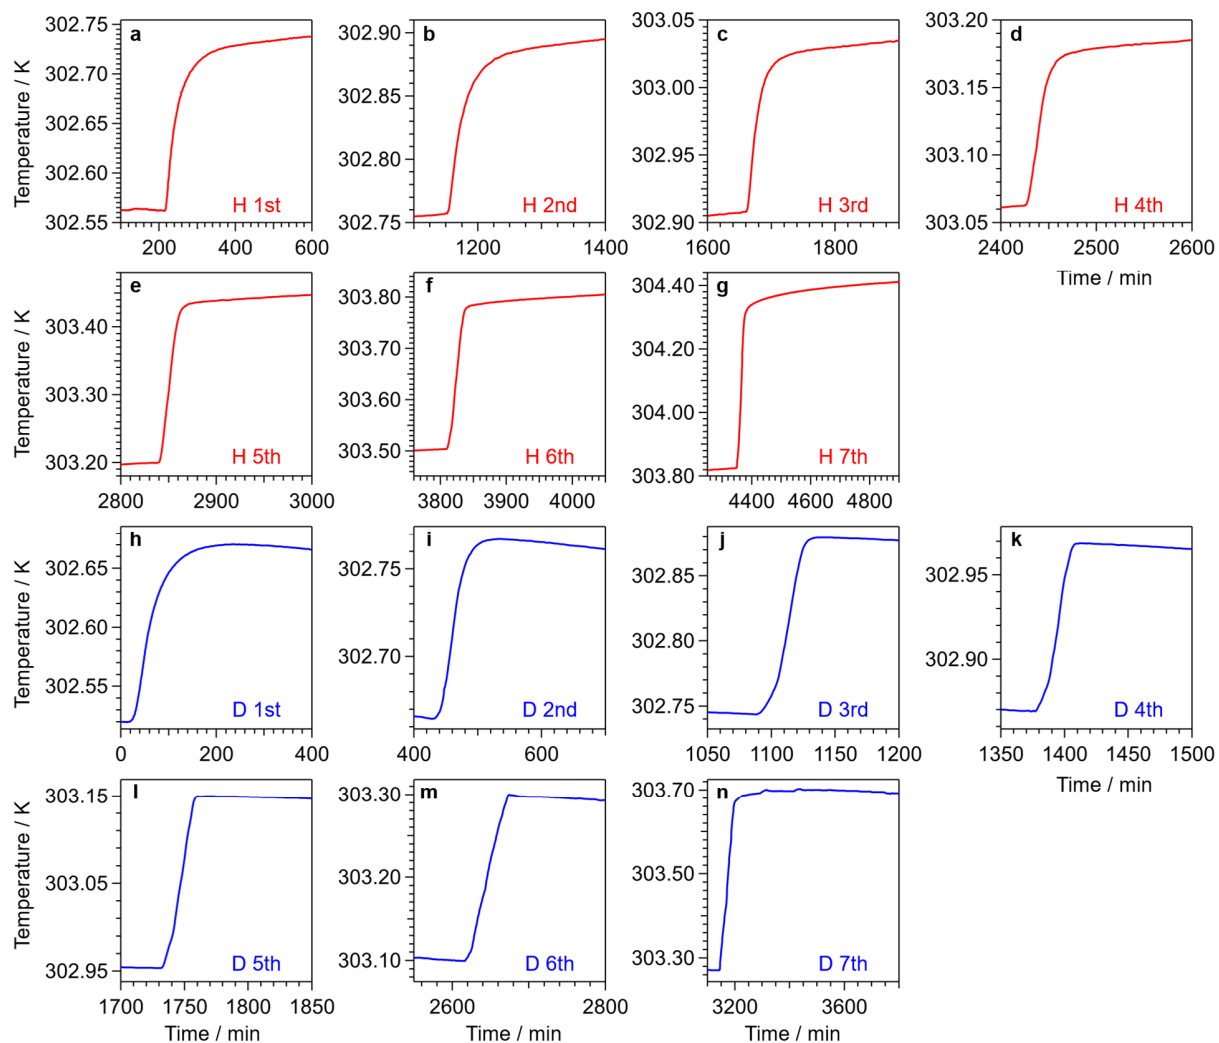

**Figure S3.** Expanded figures of (a)–(g) Figure 2a and (h)–(n) Figure 2b at each step in the main text, respectively.

### Calculation of the enthalpy change

The enthalpy change for each step was calculated by following equation (the same equation as in the main text).

$$-\Delta H_n = (C_{p_{\text{cell}}} + C_{p_{\text{Pd}}} + C_{p_{\text{H}_2}}) \times \Delta T_n - V\Delta P$$

The value of  $C_{p_{\text{cell}}} + C_{p_{\text{Pd}}}$  was measured at several temperatures, as shown in Figure S4. We estimated  $C_{p_{\text{cell}}} + C_{p_{\text{Pd}}}$  at the measurement temperature at each step, taken from the midpoint of  $\Delta T_n$  by a linear fit of the measured  $C_{p_{\text{cell}}} + C_{p_{\text{Pd}}}$  data.

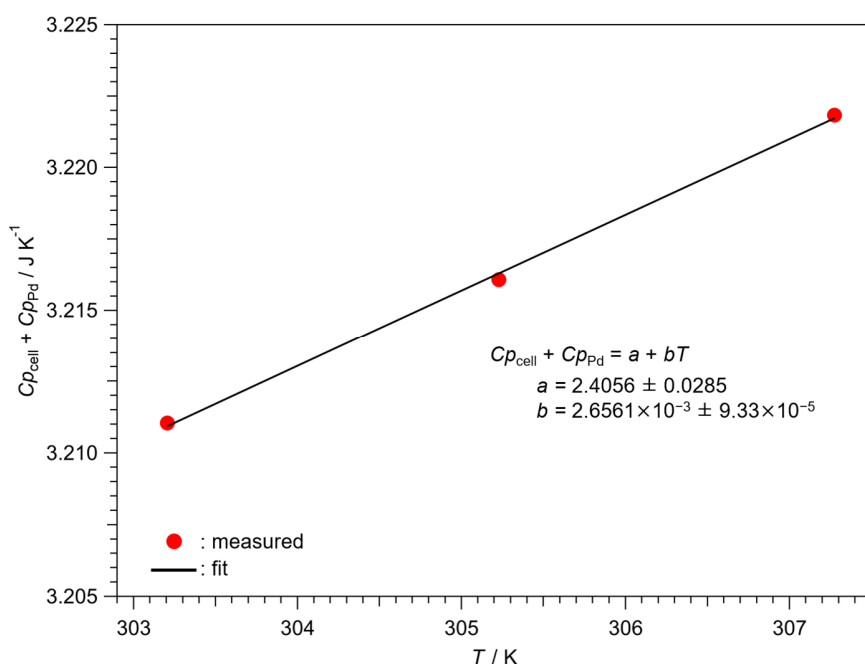

**Figure S4.** The  $C_{p_{\text{cell}}} + C_{p_{\text{Pd}}}$  values measured at several temperatures plotted with the fitting line.

The value of  $C_{p_{\text{H}_2}}$  (or  $C_{p_{\text{D}_2}}$  for D) was calculated by the Shomate equation:

$$C_{p_{\text{H}_2}} \left( \frac{T}{1000} \right) = A + B \left( \frac{T}{1000} \right) + C \left( \frac{T}{1000} \right)^2 + D \left( \frac{T}{1000} \right)^3 + E \left( \frac{T}{1000} \right)^{-2}$$

where the parameters  $A$ ,  $B$ ,  $C$ ,  $D$ , and  $E$  are taken from literature.<sup>3</sup>

### Correction of the enthalpy changes to the values at standard temperature (298.15 K)

The enthalpy change at each equilibrium temperature and at the standard temperature can be written as follows (the same way can be applied for both H and D).

$$H_{\text{PdH}_x}(T_f) + \frac{y-x}{2} H_{\text{H}_2}(T_f) = H_{\text{PdH}_y}(T_f) - \Delta H_n(T_f) \quad (\text{S1})$$

$$H_{\text{PdH}_x}(298.15 \text{ K}) + \frac{y-x}{2} H_{\text{H}_2}(298.15 \text{ K}) = H_{\text{PdH}_y}(298.15 \text{ K}) - \Delta H_n(298.15 \text{ K}) \quad (\text{S2})$$

From (S1)–(S2) and  $C_p = \left(\frac{\partial H}{\partial T}\right)_p$ :

$$\begin{aligned} \int_{298.15 \text{ K}}^{T_f} C_{p,\text{PdH}_x} dT + \frac{y-x}{2} \int_{298.15 \text{ K}}^{T_f} C_{p,\text{H}_2} dT &= \int_{298.15 \text{ K}}^{T_f} C_{p,\text{PdH}_y} dT - \Delta H_n(T_f) + \Delta H_n(298.15 \text{ K}) \\ -\Delta H_n(298.15 \text{ K}) &= -\Delta H_n(T_f) + \int_{298.15 \text{ K}}^{T_f} (C_{p,\text{PdH}_y} - C_{p,\text{PdH}_x}) dT - \frac{y-x}{2} \int_{298.15 \text{ K}}^{T_f} C_{p,\text{H}_2} dT \\ &\approx -\Delta H(T_f) + \int_{298.15 \text{ K}}^{T_f} (y-x) C_E(T) dT - \frac{y-x}{2} C_{p,\text{H}_2}(298.15 \text{ K}) \times (T_f - 298.15 \text{ K}). \end{aligned}$$

Here,  $C_E(T)$  is the Einstein heat capacity

$$C_E(T) = 3R \left(\frac{\Theta_E}{T}\right)^2 \frac{e^{\frac{\Theta_E}{T}}}{\left(e^{\frac{\Theta_E}{T}} - 1\right)^2},$$

where  $\Theta_E$  is the Einstein temperature of H or D in the  $\alpha$  phase or the  $\beta$  phase. We used the  $\Theta_E$  values, 789 K and 557 K for H and D in the  $\alpha$  phase, and 658 K and 464 K for H and D in the  $\beta$  phase, respectively.<sup>4</sup> The value of  $C_{p,\text{H}_2}$  and  $C_{p,\text{D}_2}$  was calculated as  $28.837 \text{ J K}^{-1} (\text{mol H}_2)^{-1}$  and  $29.193 \text{ J K}^{-1} (\text{mol D}_2)^{-1}$ , by the Shomate equation.<sup>3</sup>

### Sample temperature of the other runs

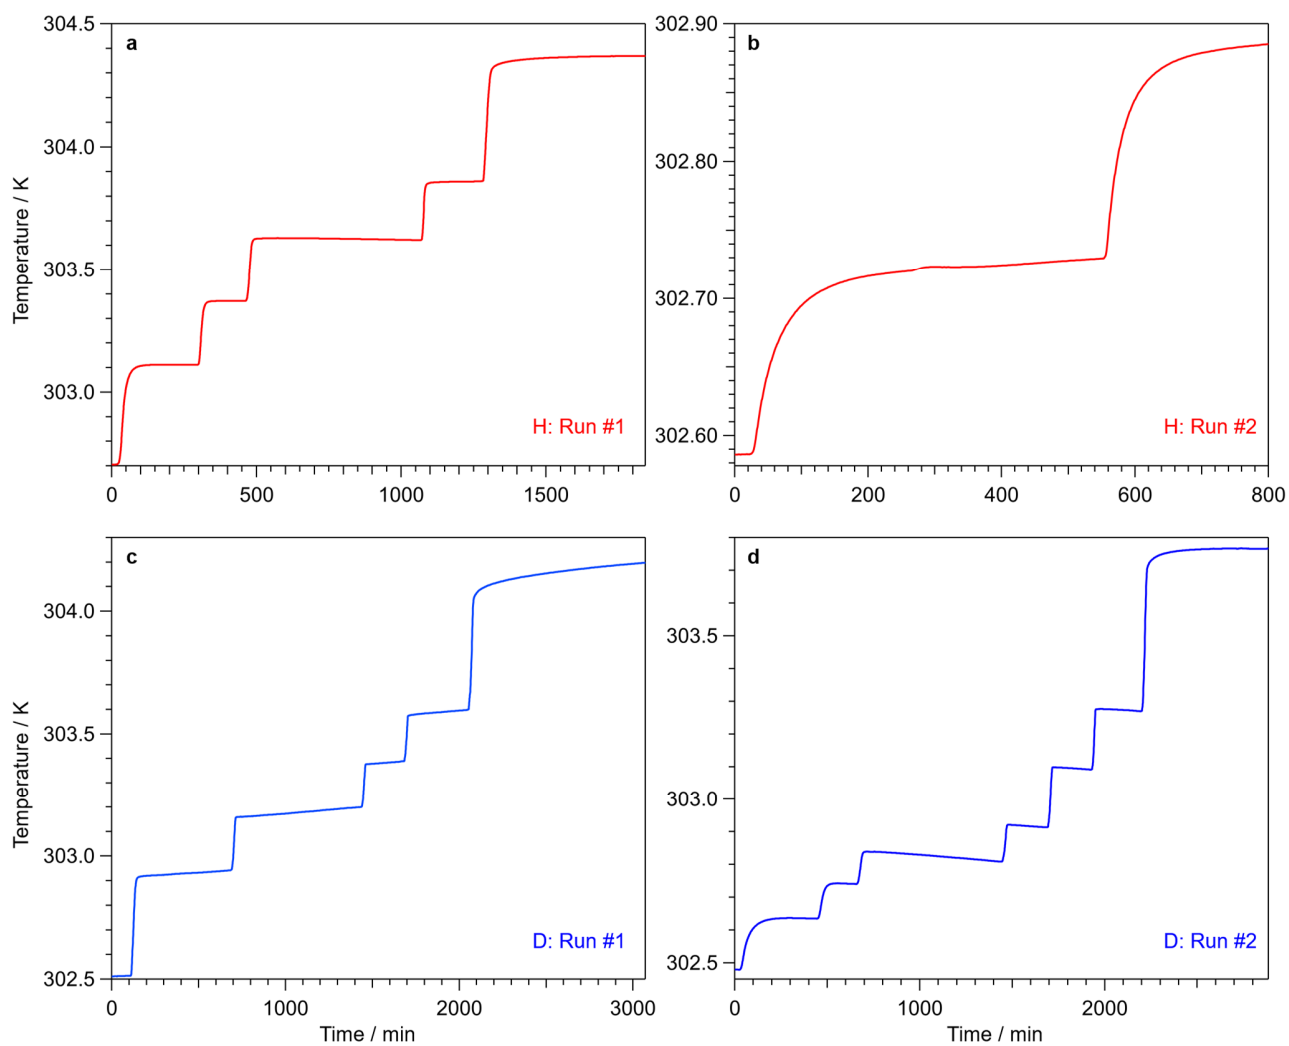

**Figure S5.** (a)–(d) The sample temperature in the other runs of the measurements. Three runs were measured for both H and D. Run #3 for H and D is shown in Figure 2a and 2b in the main text.

## H<sub>2</sub>(D<sub>2</sub>) pressure–composition (PC) isotherms at 303 K

The H<sub>2</sub> and D<sub>2</sub> PC isotherms of bulk Pd were measured from 10<sup>−3</sup> up to 101.3 kPa by a volumetric technique, using a PCT apparatus (BELSORP-max, Microtrac BEL Corp.).

Figure S6 shows the H<sub>2</sub> and D<sub>2</sub> PC isotherms of bulk Pd measured at 303 K. The pressure plateau corresponding to the  $\alpha$ – $\beta$  phase transition appears at around H(D)/Pd = 0.03 (Figure S6b). Thus, the  $\alpha$ – $\beta$  phase boundary exists at H(D)/Pd = 0.03.

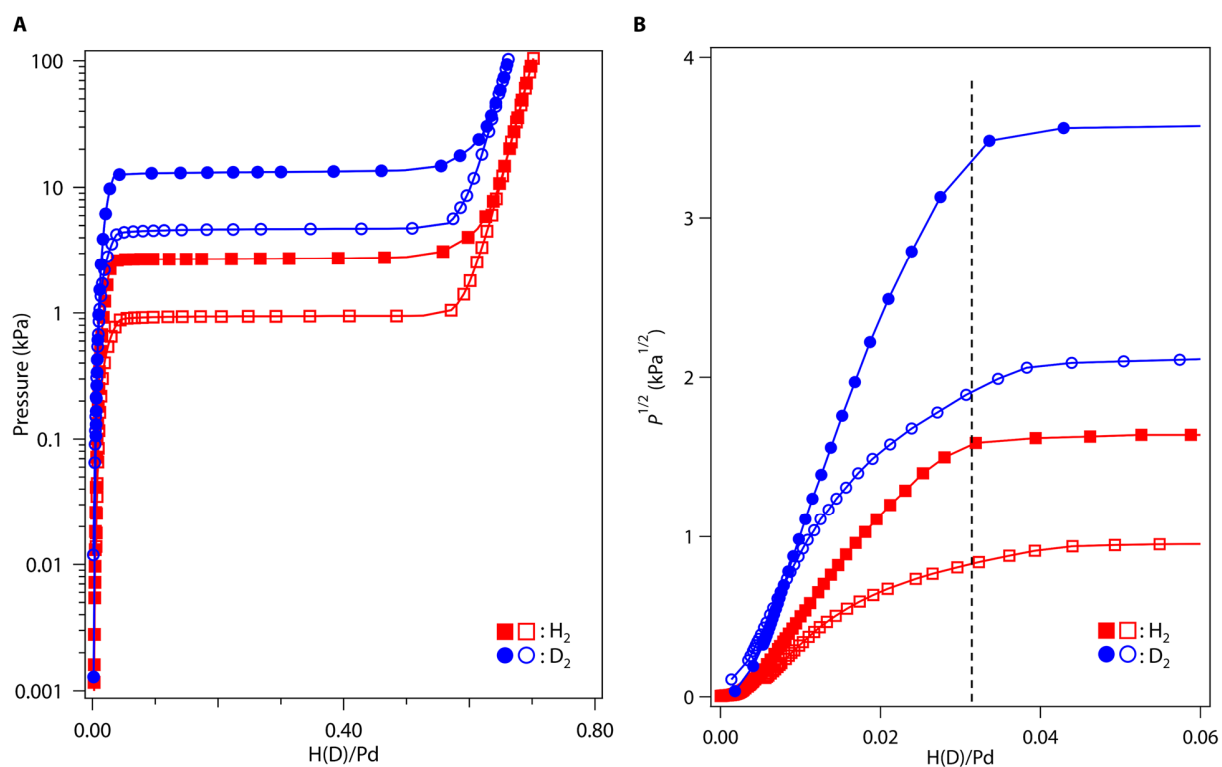

**Figure S6.** H<sub>2</sub>(D<sub>2</sub>) pressure–composition isotherms of bulk Pd. (a) H<sub>2</sub> (red squares) and D<sub>2</sub> (blue circles) sorption isotherms measured at 303 K (closed: absorption, open: desorption). (b) The expanded figure in the  $\alpha$ -phase region on absorption process. Dashed line shows the  $\alpha$ – $\beta$  phase boundary.

## References

- (1) Yamamuro, O.; Oguni, M.; Matsuo, T.; Suga, H. Construction of an Adiabatic High-Pressure Calorimeter Using Helium Gas for Pressurization. *Bull. Chem. Soc. Jpn.* **1987**, *60*, 1269–1275.
- (2) Akiba, H.; Hashimoto, N.; Kofu, M.; Kobayashi, H.; Kitagawa, H.; Yamamuro, O. Development of Adiabatic Calorimetry System for Enthalpy of Gas Absorption/Adsorption and Its Application to H<sub>2</sub>/D<sub>2</sub> Absorption into Palladium Nanoparticles. *Thermochim. Acta* **2018**, *670*, 87–91.
- (3) Chase, M. W., Jr. NIST-JANAF Thermochemical Tables, Fourth Edition. *J. Phys. Chem. Ref. Data Monogr.* **9** **1998**, 1–1951.
- (4) Lässer, R.; Klatt, K.-H. Solubility of Hydrogen Isotopes in Palladium. *Phys. Rev. B* **1983**, *28* (2), 748–758.
